# Supplementary material
Source: publisher figshare collection journal article supplement (https://rs.figshare.com/ndownloader/files/14198855)
Supplement: Supplementary file 1 [file 14198855]

## ELECTRONIC SUPPLEMENTARY MATERIAL

### Raw-material selectivity in hook-tool-crafting New Caledonian crows

Barbara C. Klump, Mathieu Cantat and Christian Rutz

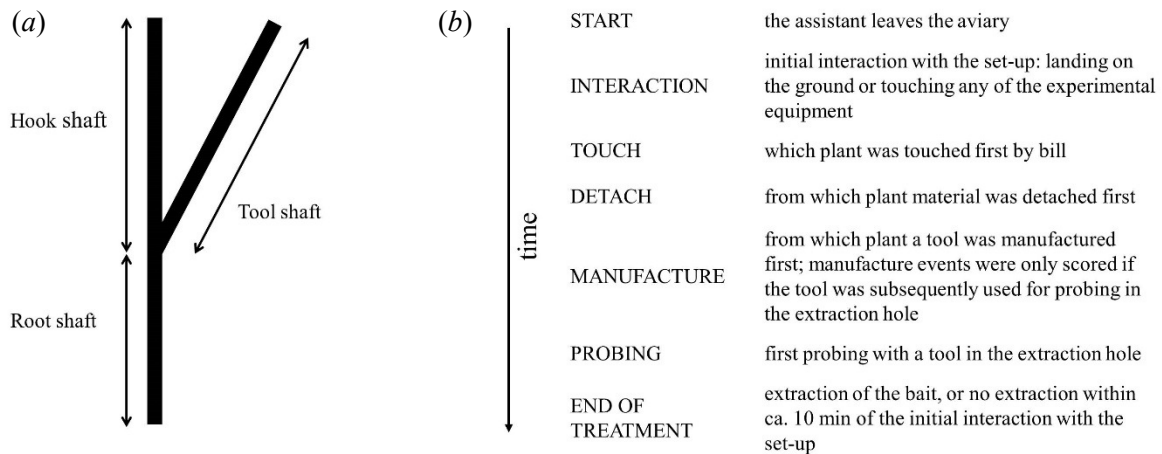

**Supplementary figure 1.** Terminology and key events. (a) Terminology for stems with a single fork. All side branches suitable for hooked stick tool making but one were removed, and all leaves were removed from the tool shaft. (b) Key events scored during video analyses.

**Supplementary table 1.** Inter-observer agreement. (a) Cohen's kappa coefficients for key events (see supplementary figure 1b). (b) Correlation coefficients for the time it took birds to express certain behaviours.

| (a)                                                                                                                                                                                                 | First plant...            | Cohen's kappa coefficient |
|-----------------------------------------------------------------------------------------------------------------------------------------------------------------------------------------------------|---------------------------|---------------------------|
|                                                                                                                                                                                                     | ...touched                | $\kappa = 0.58^a$         |
|                                                                                                                                                                                                     | ...material detached from | $\kappa = 1$              |
|                                                                                                                                                                                                     | ...tool manufactured from | $\kappa = 1$              |
| <sup>a</sup> Both disagreements for 'touch' were due to a misinterpretation of the scoring definition. Re-scoring of these cases by M.C. after clarification resulted in an adjusted $\kappa = 1$ . |                           |                           |
| (b)                                                                                                                                                                                                 | Time of first...          | Correlation coefficient   |
|                                                                                                                                                                                                     | ...interaction            | $r = 1, p < 0.001$        |
|                                                                                                                                                                                                     | ...touch                  | $r = 1, p < 0.001$        |
|                                                                                                                                                                                                     | ...detachment             | $r = 1, p < 0.001$        |
|                                                                                                                                                                                                     | ...manufacture            | $r = 1, p < 0.001$        |
